# Supplementary material for: Deterministic processes dominate soil microbial community assembly in subalpine coniferous forests on the Loess Plateau
Source: PeerJ journal article supplement (doi:10.7717/peerj.6746), 2019-05-07

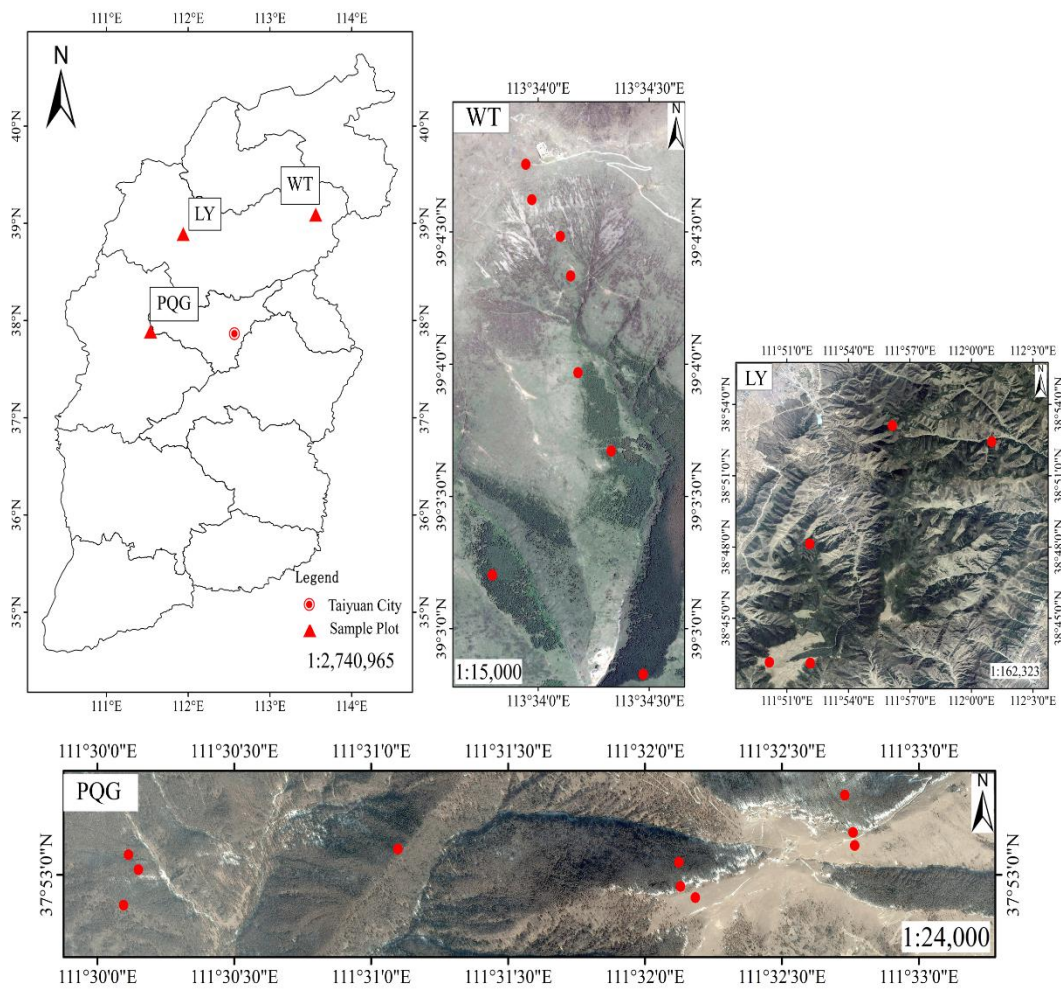

Supplement: FigureS1.pdf [file FigureS1.pdf]
